# Supplementary material
Source: PubMed Central journal article supplement (PMC3593341)
Supplement: NIHMS442121-supplement-Supplementary_materials.pdf [file NIHMS442121-supplement-Supplementary_materials.pdf]

## Supplementary Online Content

Carolyn E. Sartor, PhD; Julia D. Grant, PhD; Michael T. Lynskey, PhD; Vivia V. McCutcheon, PhD; Mary Waldron, PhD; Dixie J. Statham, DPsych; Kathleen K. Bucholz, PhD; Pamela A. F. Madden, PhD; Andrew C. Heath, DPhil; Nicholas G. Martin, PhD; Elliot C. Nelson, MD. Common heritable contributions to low-risk trauma, high-risk trauma, posttraumatic stress disorder, and major depression. *Arch Gen Psychiatry*. 2012;69(3):293-299.

**eTable 1.** Summary of Twin Recruitment

**eTable 2.** Demographic Characteristics and Prevalence of Psychiatric Disorders

**eTable 3.** Twin and Sibling Tetrachoric Correlations (and 95% CIs) for Low-risk Trauma, High-risk Trauma, PTSD, and MDD

**eTable 4.** Prevalence of Traumatic Events (Cohort II)

**eTable 5.** Magnitude of Additive Genetic (A) and Non-shared Environmental (E) Influences (95% CIs also shown) on Low-risk Trauma, High-risk Trauma, and MDD (Cohort II)

N=6219

**eFigure 1.** Saturated quadrivariate AE model of liability to MDD, trauma, and PTSD.\*

**eFigure 2.** Trivariate model of liability to MDD and trauma in the cohort II sample.\*

This supplementary material has been provided by the authors to give readers additional information about their work.

©2012 American Medical Association. All rights reserved.

**eTable 1. Summary of Twin Recruitment \***

| <b><u>Recruitment Status</u></b>                                                  | <b><u>N</u></b> | <b><u>%</u></b> |
|-----------------------------------------------------------------------------------|-----------------|-----------------|
| <u>Interviewed</u>                                                                | <u>1567</u>     | <u>61.2</u>     |
| <u>Consented to interview, but refused family contact (ineligible)</u>            | <u>8</u>        | <u>0.3</u>      |
| <u>Ineligible due to refusal of family members</u>                                | <u>233</u>      | <u>9.1</u>      |
| <u>Ineligible due to not enough family members to qualify</u>                     | <u>160</u>      | <u>6.2</u>      |
| <u>Deceased</u>                                                                   | <u>34</u>       | <u>1.3</u>      |
| <u>Incapable due to illness or disability</u>                                     | <u>14</u>       | <u>0.5</u>      |
| <u>Lost to contact</u>                                                            | <u>55</u>       | <u>2.1</u>      |
| <u>Overseas</u>                                                                   | <u>17</u>       | <u>0.7</u>      |
| <u>Unable to participate – miscellaneous reasons</u>                              | <u>5</u>        | <u>0.2</u>      |
| <u>Prior non-contact request for future studies</u>                               | <u>41</u>       | <u>1.6</u>      |
| <u>Refused</u>                                                                    | <u>427</u>      | <u>16.7</u>     |
| <u>* Does not include individuals in progress when data collection was closed</u> |                 |                 |

**eTable 2. Demographic Characteristics and Prevalence of Psychiatric Disorders**

|                                         | <b><u>Females<br/>(n=1621)</u></b> | <b><u>Males<br/>(n= 970)</u></b> |
|-----------------------------------------|------------------------------------|----------------------------------|
| <b><u>Age, mean (SD)</u></b>            | <b><u>38.6 (4.5)</u></b>           | <b><u>38.7 (5.0)</u></b>         |
| <b><u>Educational attainment</u></b>    |                                    |                                  |
| <u>College degree or higher</u>         | <u>28.1 %</u>                      | <u>28.4 %</u>                    |
| <u>Some post-secondary</u>              | <u>29.0 %</u>                      | <u>29.3 %</u>                    |
| <u>Secondary school degree</u>          | <u>30.3 %</u>                      | <u>33.0 %</u>                    |
| <u>No secondary school degree</u>       | <u>12.5 %</u>                      | <u>9.4 %</u>                     |
| <b><u>Marital status</u></b>            |                                    |                                  |
| <u>Married</u>                          | <u>64.6 %</u>                      | <u>58.6 %</u>                    |
| <u>Separated</u>                        | <u>4.6 %</u>                       | <u>4.4 %</u>                     |
| <u>Divorced or widowed</u>              | <u>9.8 %</u>                       | <u>8.2 %</u>                     |
| <u>Never married</u>                    | <u>21.0 %</u>                      | <u>28.8 %</u>                    |
| <b><u>Psychiatric disorders</u></b>     |                                    |                                  |
| <u>Conduct disorder</u>                 | <u>4.8 %</u>                       | <u>14.8 %</u>                    |
| <u>Major depressive disorder</u>        | <u>37.9 %</u>                      | <u>27.3 %</u>                    |
| <u>Post-traumatic stress disorder *</u> | <u>23.9 %</u>                      | <u>10.0 %</u>                    |
| <u>Panic disorder</u>                   | <u>4.4 %</u>                       | <u>2.5 %</u>                     |
| <u>Alcohol dependence</u>               | <u>16.7 %</u>                      | <u>30.8 %</u>                    |
| <u>Nicotine dependence</u>              | <u>30.0 %</u>                      | <u>33.5 %</u>                    |
| <u>Illicit drug dependence</u>          | <u>6.0 %</u>                       | <u>12.3 %</u>                    |

\* Limited to trauma exposed (Females N=934; Males N=709)

**eTable 3. Twin and Sibling Tetrachoric Correlations (and 95% Confidence Intervals) for Low-risk Trauma, High-risk Trauma, PTSD, and MDD**

|                              | <u>Low-risk Trauma</u>            | <u>High-risk Trauma</u>           | <u>PTSD</u>                        | <u>MDD</u>                        |
|------------------------------|-----------------------------------|-----------------------------------|------------------------------------|-----------------------------------|
| <u>MZ Twins (N=141-341)</u>  | <u>0.49</u><br><u>(0.42-0.56)</u> | <u>0.62</u><br><u>(0.56-0.69)</u> | <u>0.31</u><br><u>(0.18-0.45)</u>  | <u>0.40</u><br><u>(0.32-0.47)</u> |
| <u>DZ Twins (N=161-313)</u>  | <u>0.12</u><br><u>(0.03-0.21)</u> | <u>0.24</u><br><u>(0.15-0.33)</u> | <u>0.07</u><br><u>(-0.06-0.21)</u> | <u>0.19</u><br><u>(0.10-0.28)</u> |
| <u>Twin-Sib (N=712-1765)</u> | <u>0.23</u><br><u>(0.20-0.27)</u> | <u>0.20</u><br><u>(0.16-0.24)</u> | <u>0.14</u><br><u>(0.10-0.18)</u>  | <u>0.14</u><br><u>(0.07-0.22)</u> |
| <u>Sib-Sib (N =236-577)</u>  | <u>0.12</u><br><u>(0.05-0.18)</u> | <u>0.24</u><br><u>(0.17-0.31)</u> | <u>0.15</u><br><u>(0.01-0.30)</u>  | <u>0.09</u><br><u>(0.03-0.16)</u> |

| <b>eTable 4. Prevalence of Traumatic Events (Cohort II)</b> |                             |                           |
|-------------------------------------------------------------|-----------------------------|---------------------------|
| <b>Event</b>                                                | <b>Females<br/>(n=3429)</b> | <b>Males<br/>(n=2773)</b> |
| <b>High-risk</b>                                            |                             |                           |
| Rape                                                        | 8.4                         | 1.5                       |
| Sexual molestation                                          | 13.9                        | 4.9                       |
| Physical attack or assault                                  | 5.9                         | 14.7                      |
| Childhood physical abuse                                    | 4.2                         | 2.9                       |
| Serious childhood neglect                                   | 1.9                         | 1.3                       |
| <i>Any high-risk trauma</i>                                 | 23.6                        | 20.5                      |
| <b>Low-risk</b>                                             |                             |                           |
| Combat exposure                                             | 0.1                         | 0.4                       |
| Life-threatening accident                                   | 12.8                        | 26.8                      |
| Fire, flood, or natural disaster                            | 11.3                        | 17.1                      |
| Witnessed injury or killing                                 | 16.2                        | 32.3                      |
| Threatened with weapon/<br>held captive                     | 5.1                         | 11.6                      |
| <i>Any low-risk trauma</i>                                  | 35.4                        | 57.1                      |

**eTable 52. Magnitude of Additive Genetic (A) and Non-shared Environmental (E) Influences (95% confidence intervals also shown) on Low-risk Trauma, High-risk Trauma, and MDD (Cohort II) N=6219**

|                  | <b>Additive genetic</b> | <b>Non-shared environmental</b> |
|------------------|-------------------------|---------------------------------|
| Low-risk Trauma  | 0.40 (0.33 – 0.47)      | 0.60 (0.53 – 0.67)              |
| High-risk Trauma | 0.61 (0.54 – 0.67)      | 0.39 (0.33 – 0.46)              |
| MDD              | 0.37 (0.29 – 0.44)      | 0.63 (0.56 – 0.71)              |

**eTable 63. Correlations Between Genetic and Non-shared Environmental Contributions to Low-risk Trauma, High-risk Trauma, and MDD (Cohort II) N=6219\***

|                  | Low-Risk Trauma | High-Risk Trauma    | MDD                 |
|------------------|-----------------|---------------------|---------------------|
| Low-risk Trauma  |                 | 0.56<br>(0.47-0.64) | 0.46<br>(0.36-0.59) |
| High-risk Trauma | -----           |                     | 0.72<br>(0.62-0.81) |
| MDD              | -----           | -----               |                     |

\* Genetic correlations shown above the diagonal, non-shared environmental correlations shown below

Supplementary Figure 1. Saturated quadrivariate AE model of liability to MDD, trauma, and PTSD\*

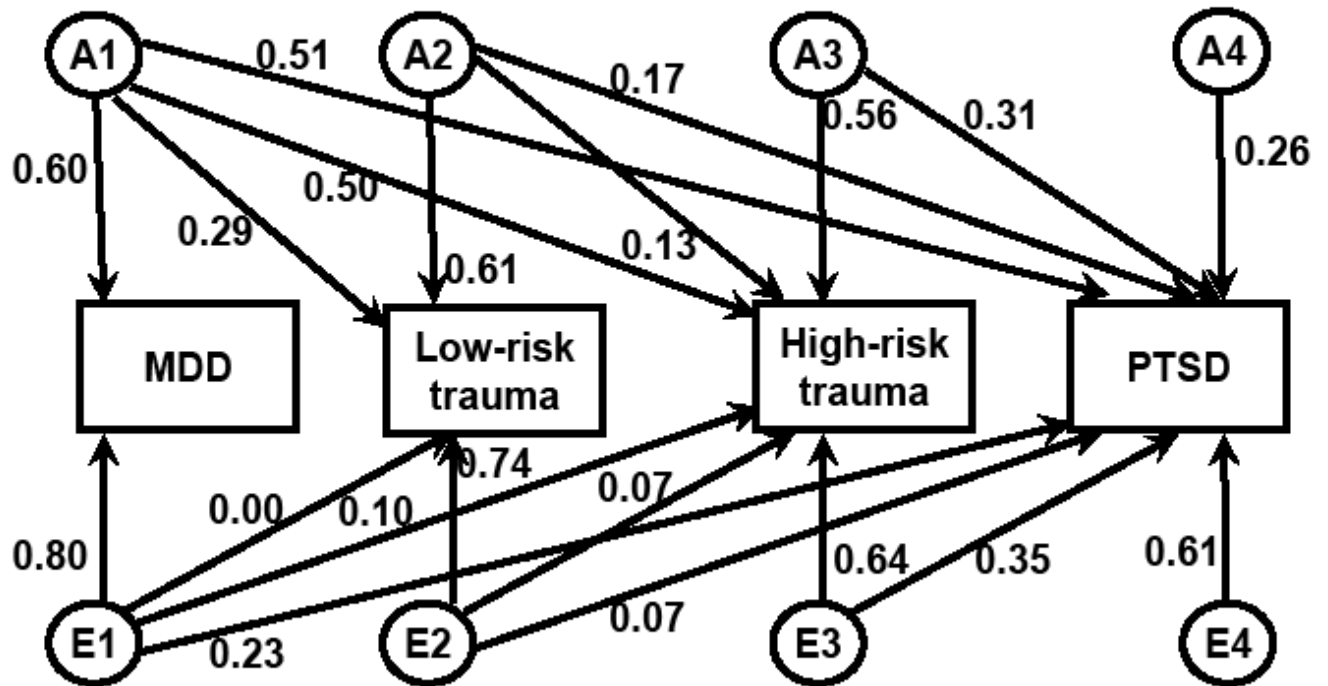

\* Standardized parameter estimates are shown. A1-A4 denote genetic factors; E1-E4 are the non-shared environmental factors.



Supplementary Figure 2. Trivariate model of liability to MDD and trauma in the Cohort II sample\*

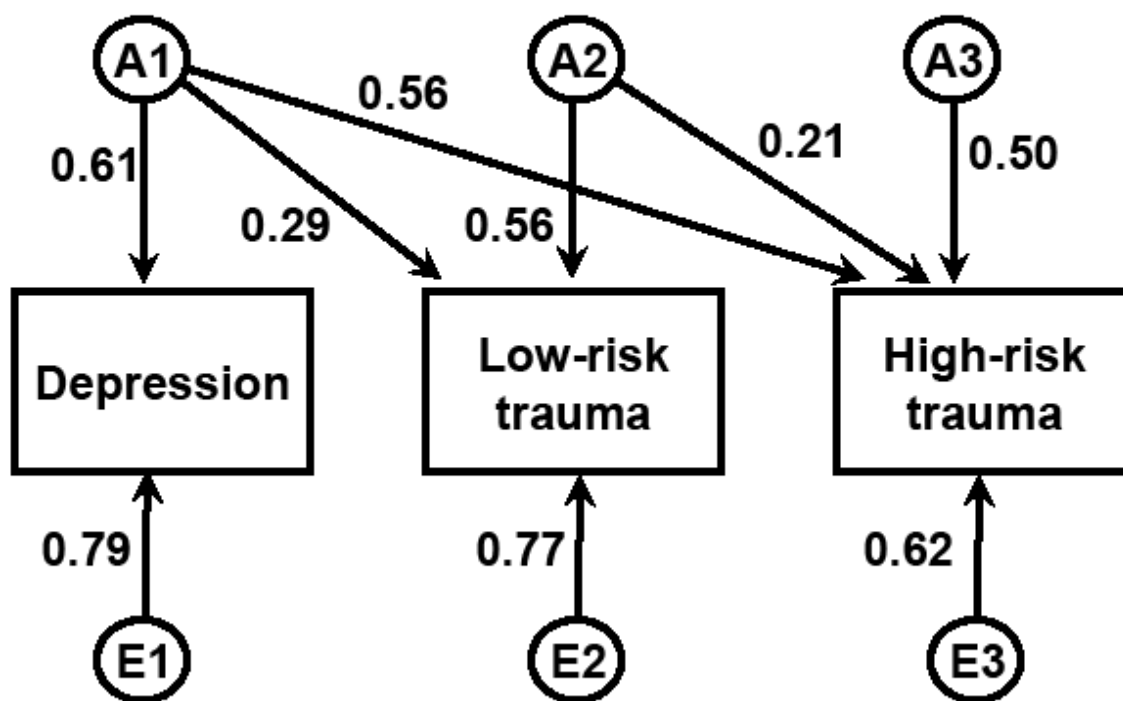

\* Standardized parameter estimates are shown. A1-A3 denote genetic factors; E1-E3 are the non-shared environmental factors.
